# Supplementary material
Source: PubMed Central journal article supplement (PMC3069142)
Supplement: NIHMS277656-supplement-1_si_001.pdf [file NIHMS277656-supplement-1_si_001.pdf]

## Supporting Information

# The pH-tunable Oxidase-like Activity of Cerium Oxide Nanoparticles Achieves Sensitive Fluorogenic Detection of Cancer Biomarkers

Atul Asati<sup>†</sup>, Charalambos Kaittanis<sup>†‡</sup>, Santimukul Santra<sup>†</sup>, J Manuel Perez<sup>†‡§\*</sup>

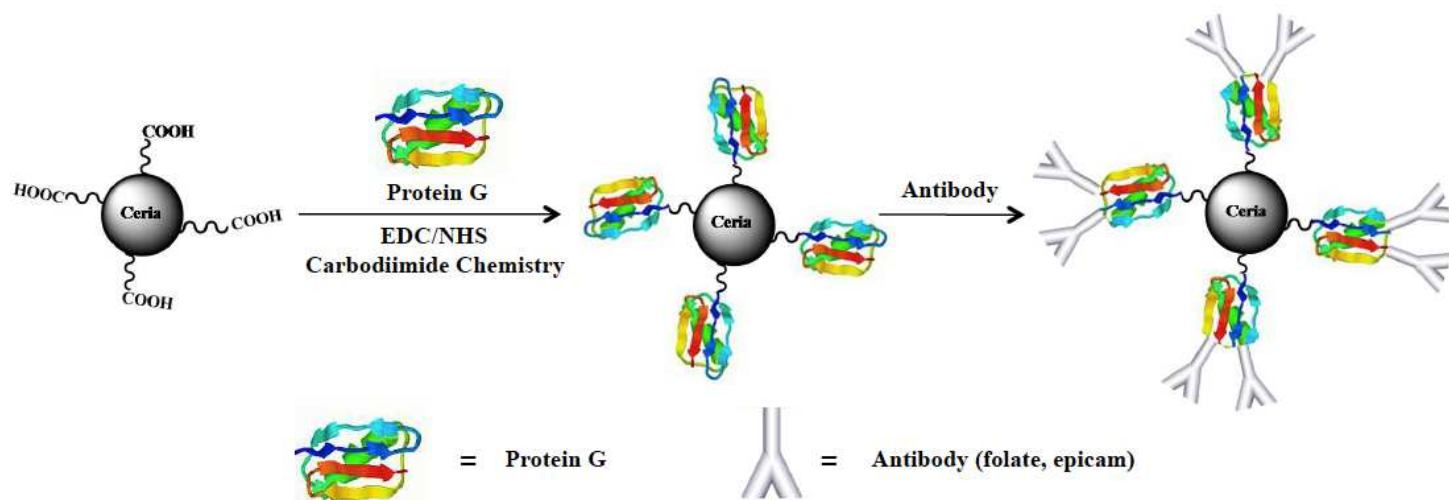

**Scheme 1.** Schematic representation of the synthesis of Protein-G-PNC conjugate. The surface of polyacrylic-acid-coated nanoceria was functionalized with Protein G via carbodiimide chemistry, leading to further coupling with antibodies.

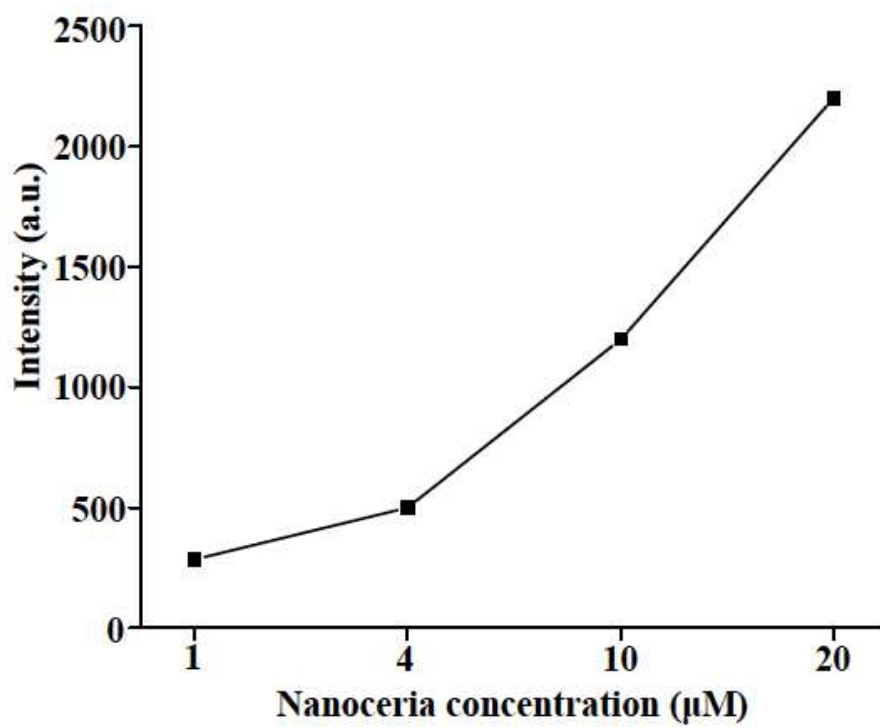

**Figure S1.** Concentration dependent intensity increase in nanoceria mediated oxidation of ampliflu.

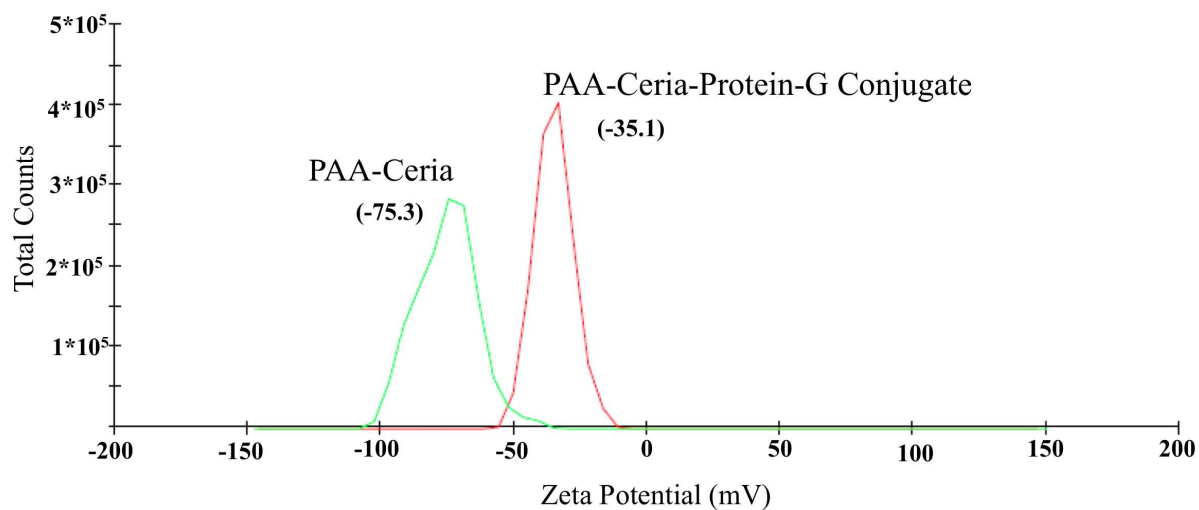

**Figure S2.** Confirmation of protein-G conjugation on PNC by zeta potential measurement. Surface conjugation of protein-G on polyacrylic acid coated nanoceria was confirmed by zeta potential, as shown by shift in zeta potential value from -75.3 to -35.1 mV for conjugated nanoceria.
